# Supplementary material for: Functional re-tooling of rhizosphere guilds is driven by agricultural management and scion genotype in apple
Source: Research Square preprint supplement (doi:10.21203/rs.3.rs-8562047/v1), 2026-01-14
Supplement: Supplementary file 2 [file 7cd6eb34a2f67a7eef824e1f.docx]

**Functional Re-tooling of Rhizosphere Guilds Is Driven by Agricultural Management and Scion Genotype**

Mohammad Zarrabian1, Sherif M. Sherif1*

1. Virginia Tech, School of Plant and Environmental Sciences, Alson H. Smith Jr. Agricultural Research and Extension Center, Winchester, VA, 22602, United States.

* Corresponding author: Sherif M. Sherif; E-mail address: ssherif@vt.edu; Tel: +1 (540)- 232-6035

**Supplementary References: Targeted functional guild curation**

This section provides the references used to manually curate the bacterial and fungal genera for the targeted functional guild analysis (see Methods 2.4.5). The guilds were defined as follows:

**Bacterial Guilds:**

**(I) Biocontrol & Plant Growth Promotion (PGP)**

**Bacillus:**

1. Bharti N, Yadav D, Barnawal D, Maji D, Kalra A (2013) Exiguobacterium oxidotolerans, a halotolerant plant growth promoting rhizobacteria, improves yield and content of secondary metabolites in Bacopa monnieri (L.) Pennell under primary and secondary salt stress. World J Microbiol Biotechnol 29(2):379-387. <https://doi.org/10.1007/s11274-012-1192-1>
2. Maheshwari DK, Dheeman S, Agarwal M (2015) Phytohormone-producing PGPR for sustainable agriculture. In: Bacterial Metabolites in Sustainable Agroecosystem. Springer, pp 159-182. <https://doi.org/10.1007/978-3-319-24654-3_7>
3. Shafi J, Tian H, Ji M (2017) Bacillus species as versatile weapons for plant pathogens: A review. Biotechnol Biotechnol Equip 31(3):446-459. <https://doi.org/10.1080/13102818.2017.1286950>
4. Sivasakthi S, Usharani G, Saranraj P (2014) Biocontrol potentiality of plant growth promoting bacteria (PGPR)—Pseudomonas fluorescens and Bacillus subtilis: A review. Afr J Agric Res 9(16):1265-1277. <https://doi.org/10.5897/AJAR2013.7914>
5. Zarrabian M, Adhikary L, Nita M, Sriyanka L, Sherif SM (2025) Toxicological and Functional Assessment of Minicell-Encapsulated dsRNA on Biocontrol Agents in Agriculture. ACS Environ Au. <https://doi.org/10.1021/acsenvironau.4c00111>

**Variovorax:**

1. Belimov AA, Dodd IC, Hontzeas N et al (2009) Rhizosphere bacteria containing 1-aminocyclopropane-1-carboxylate deaminase increase yield of plants grown in drying soil via both local and systemic hormone signalling. New Phytol 181(2):413-423. <https://doi.org/10.1111/j.1469-8137.2008.02657.x>
2. Han Q, Wu F, Wang X et al (2015) The bacterial lipopeptide iturins induce Verticillium dahliae cell death by affecting fungal signaling pathways and mediate plant defence responses involved in pathogen-associated molecular pattern-triggered immunity. Environ Microbiol 17(4):1166-1188. <https://doi.org/10.1111/1462-2920.12538>
3. Sun SL, Yang WL, Fang WW, Zhao YX, Guo L, Dai YJ (2018) The plant growth-promoting rhizobacterium Variovorax boronicumulans CGMCC 4969 regulates the level of indole-3-acetic acid synthesized from indole-3-acetonitrile. Appl Environ Microbiol 84(16):e00298-18. <https://doi.org/10.1128/AEM.00298-18>

**Paenibacillus:**

1. Timmusk S, Wagner EGH (1999) The plant-growth-promoting rhizobacterium Paenibacillus polymyxa induces changes in Arabidopsis thaliana gene expression: a possible connection between biotic and abiotic stress responses. Mol Plant Microbe Interact 12:951-959. <https://doi.org/10.1094/MPMI.1999.12.11.951>
2. Grady EN, MacDonald J, Liu L, Richman A, Yuan ZC (2016) Current knowledge and perspectives of Paenibacillus: A review. Microb Cell Fact 15(1):1-18. <https://doi.org/10.1186/s12934-016-0603-7>
3. Timmusk S, Behers L, Muthoni J, Muraya A, Aronsson AC (2017) Perspectives and challenges of microbial application for crop improvement. Front Plant Sci 8:49. <https://doi.org/10.3389/fpls.2017.00049>

**Streptomyces:**

1. Compant S, Duffy B, Nowak J, Clément C, Barka EA (2005) Use of plant growth-promoting bacteria for biocontrol of plant diseases: Principles, mechanisms of action, and future prospects. Appl Environ Microbiol 71(9):4951-4959. <https://doi.org/10.1128/AEM.71.9.4951-4959.2005>
2. Faheem M, Raza W, Zhong W, Nan Z, Shen Q, Xu Y (2015) Evaluation of the biocontrol potential of Streptomyces goshikiensis YCXU against Fusarium oxysporum f. sp. niveum. Biol Control 81:101-110. <https://doi.org/10.1016/j.biocontrol.2014.11.012>

**Stenotrophomonas:**

1. Ryan RP, Monchy S, Cardinale M et al (2009) The versatility and adaptation of bacteria from the genus Stenotrophomonas. Nat Rev Microbiol 7(7):514-525. <https://doi.org/10.1038/nrmicro2163>
2. Schmidt CS, Alavi M, Cardinale M, Müller H, Berg G (2012) Stenotrophomonas rhizophila DSM14405T promotes plant growth probably by altering fungal communities in the rhizosphere. Biol Fertil Soils 48(8):947-960. <https://doi.org/10.1007/s00374-012-0688-z>

**Chryseobacterium:**

1. Dardanelli MS, Manyani H, González-Barroso S et al (2010) Effect of the presence of the plant growth promoting rhizobacterium (PGPR) Chryseobacterium balustinum Aur9 and salt stress in the pattern of flavonoids exuded by soybean roots. Plant Soil 328(1):483-493. <https://doi.org/10.1007/s11104-009-0127-6>
2. Montero-Calasanz MDC, Meier-Kolthoff JP, Zhang DF et al (2017) Genome-scale data call for a taxonomic rearrangement of Geodermatophilaceae. Front Microbiol 8:2501. <https://doi.org/10.3389/fmicb.2017.02501>
3. Sang MK, Jeong JJ, Kim J, Kim KD (2018) Growth promotion and root colonisation in pepper plants by phosphate-solubilising Chryseobacterium sp. strain ISE14 that suppresses Phytophthora blight. Ann Appl Biol 172(2):208-223. <https://doi.org/10.1111/aab.12413>

**(II) Nitrogen Fixation**

**Beijerinckia:**

1. Tchan YT (1984) Family VIII. Azotobacteraceae. In: Krieg NR, Holt JG (eds) Bergey's Manual of Systematic Bacteriology, vol 1. Williams & Wilkins, pp 219-220
2. Thompson JP, Skerman VBD (1979) Azotobacteraceae: The taxonomy and ecology of the aerobic nitrogen-fixing bacteria. Academic Press
3. Singh M, Kumar S, Singh DK, Ranjan T, Pandey AK (2024) Isolation and characterization of a novel nitrogen fixer Beijerinckia fluminensis strain BAUMS11 from litchi (Litchi chinensis L.) rhizosphere. J Appl Nat Sci 16(3). <https://doi.org/10.31018/jans.v16i3.5575>

**Azospirillum:**

1. Fukami J, Cerezini P, Hungria M (2018) Azospirillum: benefits that go far beyond biological nitrogen fixation. AMB Express 8(1):73. <https://doi.org/10.1186/s13568-018-0608-1>
2. Jehani MD, Singh S, Kumar D, Kumar G (2023) Azospirillum—a free-living nitrogen-fixing bacterium. In: Rhizobiome. Academic Press, pp 285-308. <https://doi.org/10.1016/B978-0-323-99896-3.00017-1>

**Sinorhizobium:**

1. Galibert F, Finan TM, Long SR et al (2001) The composite genome of the legume symbiont Sinorhizobium meliloti. Science 293(5530):668-672. <https://doi.org/10.1126/science.1060966>
2. Zarrabian M, Montiel J, Sandal N et al (2022) A promiscuity locus confers Lotus burttii nodulation with rhizobia from five different genera. Mol Plant Microbe Interact 35(11):1006-1017. <https://doi.org/10.1094/MPMI-04-22-0087-R>
3. Chen W, Li Y, Shi G et al (2025) The role of symbiotic nitrogen-fixing bacteria, Rhizobium and Sinorhizobium, as "bridges" in the rhizosphere of legumes after fomesafen application. Appl Soil Ecol 209:106013. <https://doi.org/10.1016/j.apsoil.2024.106013>

**Rhizobium:**

1. Peoples MB, Brockwell J, Herridge DF et al (2009) The contributions of nitrogen-fixing crop legumes to the productivity of agricultural systems. Symbiosis 48(1-3):1-17. <https://doi.org/10.1007/BF03179980>
2. Young JPW, Crossman LC, Johnston AWB et al (2006) The genome of Rhizobium leguminosarum has recognizable core and accessory components. Genome Biol 7(4):R34. <https://doi.org/10.1186/gb-2006-7-4-r34>
3. Zarrabian M, Montiel J, Sandal N et al (2022) A promiscuity locus confers Lotus burttii nodulation with rhizobia from five different genera. Mol Plant Microbe Interact 35(11):1006-1017. <https://doi.org/10.1094/MPMI-04-22-0087-R>

**Mesorhizobium:**

1. Jarvis BDW, Van Berkum P, Chen WX et al (1997) Transfer of Rhizobium loti, Rhizobium huakuii, Rhizobium ciceri, Rhizobium mediterraneum, and Rhizobium tianshanense to Mesorhizobium gen. nov. Int J Syst Bacteriol 47(3):895-898. <https://doi.org/10.1099/00207713-47-3-895>
2. Reeve W, O'Hara G, Chain P et al (2010) Complete genome sequence of Mesorhizobium ciceri bv. biserrulae type strain (WSM1271T). Stand Genomic Sci 2(3):228-238. <https://doi.org/10.4056/sigs.712923>
3. Zarrabian M, Montiel J, Sandal N et al (2022) A promiscuity locus confers Lotus burttii nodulation with rhizobia from five different genera. Mol Plant Microbe Interact 35(11):1006-1017. <https://doi.org/10.1094/MPMI-04-22-0087-R>

**Bradyrhizobium:**

1. Jordan DC (1982) Transfer of Rhizobium japonicum Buchanan 1980 to Bradyrhizobium gen. nov., a genus of slow-growing, root nodule bacteria from leguminous plants. Int J Syst Bacteriol 32(1):136-139. <https://doi.org/10.1099/00207713-32-1-136>
2. Kaneko T, Nakamura Y, Sato S et al (2002) Complete genomic sequence of nitrogen-fixing symbiotic bacterium Bradyrhizobium japonicum USDA110. DNA Res 9(6):189-197. <https://doi.org/10.1093/dnares/9.6.189>
3. Zarrabian M, Montiel J, Sandal N et al (2022) A promiscuity locus confers Lotus burttii nodulation with rhizobia from five different genera. Mol Plant Microbe Interact 35(11):1006-1017. <https://doi.org/10.1094/MPMI-04-22-0087-R>

**(III) Phosphate Solubilization**

**Flavobacterium:**

1. Paul D, Sinha SN (2015) Biological removal of phosphate using phosphate solubilizing bacterial consortium from synthetic wastewater: a laboratory scale. Environ Asia 8(1):1-8. <https://doi.org/10.14456/ea.2015.1>

**Burkholderia:**

1. You M, Fang S, MacDonald J, Xu J, Yuan ZC (2020) Isolation and characterization of Burkholderia cenocepacia CR318, a phosphate solubilizing bacterium promoting corn growth. Microbiol Res 233:126395. <https://doi.org/10.1016/j.micres.2019.126395>
2. Song OR, Lee SJ, Lee YS, Lee SC, Kim KK, Choi YL (2008) Solubilization of insoluble inorganic phosphate by Burkholderia cepacia DA23 isolated from cultivated soil. Braz J Microbiol 39:151-156. <https://doi.org/10.1590/S1517-83822008000100030>

**Micrococcus:**

1. Dastager SG, Deepa CK, Pandey A (2010) Isolation and characterization of novel plant growth promoting Micrococcus sp NII-0909 and its interaction with cowpea. Plant Physiol Biochem 48(12):987-992. <https://doi.org/10.1016/j.plaphy.2010.09.006>
2. Dubey A, Kumar A, Khan ML, Payasi DK (2021) Plant growth-promoting and bio-control activity of Micrococcus luteus strain AKAD 3-5 isolated from the soybean (Glycine max (L.) Merr.) rhizosphere. Open Microbiol J 15(1):88-99. <https://doi.org/10.2174/1874285802115010088>

**Pseudomonas:**

1. Miller SH, Browne P, Prigent‐Combaret C et al (2010) Biochemical and genomic comparison of inorganic phosphate solubilization in Pseudomonas species. Environ Microbiol Rep 2(3):403-411. <https://doi.org/10.1111/j.1758-2229.2009.00105.x>
2. Park KH, Lee CY, Son HJ (2009) Mechanism of insoluble phosphate solubilization by Pseudomonas fluorescens RAF15 isolated from ginseng rhizosphere and its plant growth‐promoting activities. Lett Appl Microbiol 49(2):222-228. <https://doi.org/10.1111/j.1472-765X.2009.02642.x>

**Acinetobacter:**

1. Ogut M, Er F, Kandemir N (2010) Phosphate solubilization potentials of soil Acinetobacter strains. Biol Fertil Soils 46(7):707-715. <https://doi.org/10.1007/s00374-010-0475-7>
2. Vyas P, Gulati A (2009) Organic acid production in vitro and plant growth promotion in maize under controlled environment by phosphate-solubilizing fluorescent Pseudomonas. BMC Microbiol 9(1):174. <https://doi.org/10.1186/1471-2180-9-174>
3. Kang SM, Joo GJ, Hamayun M et al (2009) Gibberellin production and phosphate solubilization by newly isolated strain of Acinetobacter calcoaceticus and its effect on plant growth. Biotechnol Lett 31(2):277-281. <https://doi.org/10.1007/s10529-008-9867-2>

**Fungal Guilds**

**(I) Biocontrol & Plant Growth Promotion (PGP)**

**Trichoderma:**

1. Lorito M, Woo SL, Harman GE, Monte E (2010) Translational research on Trichoderma: From 'omics to the field. Annu Rev Phytopathol 48:395-417. <https://doi.org/10.1146/annurev-phyto-073009-114314>
2. Vinale F, Sivasithamparam K, Ghisalberti EL et al (2008) Trichoderma–plant–pathogen interactions. Soil Biol Biochem 40(1):1-10. <https://doi.org/10.1016/j.soilbio.2007.07.002>
3. Martínez-Medina A, Del Mar Alguacil M, Pascual JA, Van Wees SCM (2014) Phytohormone profiles induced by Trichoderma isolates correspond with their biocontrol and plant growth-promoting activity on melon plants. J Chem Ecol 40(7):804-815. <https://doi.org/10.1007/s10886-014-0478-1>
4. Zarrabian M, Adhikary L, Nita M, Sriyanka L, Sherif SM (2025) Toxicological and Functional Assessment of Minicell-Encapsulated dsRNA on Biocontrol Agents in Agriculture. ACS Environ Au. <https://doi.org/10.1021/acsenvironau.4c00111>

**Pochonia:**

1. Sellitto VM, Curto G, Dallavalle E et al (2016) Effect of Pochonia chlamydosporia-based formulates on the regulation of root-knot nematodes and plant growth response. Front Life Sci 9(3):177-181. <https://doi.org/10.1080/21553769.2016.1197897>
2. Larriba E, Jaime MDLA, Nislow C, Martín-Nieto J, Lopez-Llorca LV (2015) Endophytic colonization of barley (Hordeum vulgare) roots by the nematophagous fungus Pochonia chlamydosporia reveals plant growth promotion and a general defense and stress transcriptomic response. J Plant Res 128(4):665-678. <https://doi.org/10.1007/s10265-015-0731-x>

**Beauveria:**

1. Tall S, Meyling NV (2018) Probiotics for plants? Growth promotion by the entomopathogenic fungus Beauveria bassiana depends on nutrient availability. Microb Ecol 76(4):1002-1008. <https://doi.org/10.1007/s00248-018-1180-6>
2. Senthilraja G, Anand T, Kennedy JS, Raguchander T, Samiyappan R (2013) Plant growth promoting rhizobacteria (PGPR) and entomopathogenic fungus bioformulation enhance the expression of defense enzymes and pathogenesis-related proteins in groundnut plants against leafminer insect and collar rot pathogen. Physiol Mol Plant Pathol 82:10-19. <https://doi.org/10.1016/j.pmpp.2012.11.002>

**Clonostachys:**

1. Goh YK, Marzuki NF, Tuan Pa TNFT et al (2020) Biocontrol and plant-growth-promoting traits of Talaromyces apiculatus and Clonostachys rosea consortium against Ganoderma basal stem rot disease of oil palm. Microorganisms 8(8):1138. <https://doi.org/10.3390/microorganisms8081138>
2. Ravnskov S, Jensen B, Knudsen IM et al (2006) Soil inoculation with the biocontrol agent Clonostachys rosea and the mycorrhizal fungus Glomus intraradices results in mutual inhibition, plant growth promotion and alteration of soil microbial communities. Soil Biol Biochem 38(12):3453-3462. <https://doi.org/10.1016/j.soilbio.2006.06.016>

**Metarhizium:**

1. Baron NC, de Souza Pollo A, Rigobelo EC (2020) Purpureocillium lilacinum and Metarhizium marquandii as plant growth-promoting fungi. PeerJ 8:e9005. <https://doi.org/10.7717/peerj.9005>
2. Chaudhary PJ, BL R, Patel HK et al (2023) Plant growth-promoting potential of entomopathogenic fungus Metarhizium pinghaense AAUBC-M26 under elevated salt stress in tomato. Agronomy 13(6):1577. <https://doi.org/10.3390/agronomy13061577>
3. Barelli L, Waller AS, Behie SW, Bidochka MJ (2020) Plant microbiome analysis after Metarhizium amendment reveals increases in abundance of plant growth-promoting organisms and maintenance of disease-suppressive soil. PLoS One 15(4):e0231150. <https://doi.org/10.1371/journal.pone.0231150>

**(II) Mycorrhizal Associations**

**Glomus:**

1. Bever JD, Schultz PA, Pringle A, Morton JB (2001) Arbuscular mycorrhizal fungi: More diverse than meets the eye, and the ecological tale of why. BioScience 51(11):923-931. [https://doi.org/10.1641/0006-3568(2001)051[0923:AMFMDT]2.0.CO;2](https://doi.org/10.1641/0006-3568(2001)051%5B0923:AMFMDT%5D2.0.CO;2)
2. Smith SE, Read DJ (2008) Mycorrhizal symbiosis, 3rd edn. Academic Press

**Rhizophagus:**

1. Ceballos I, Ruiz M, Fernández C et al (2013) The in vitro mass-produced model mycorrhizal fungus, Rhizophagus irregularis, significantly increases yields of the globally important food security crop cassava. PLoS One 8(8):e70633. <https://doi.org/10.1371/journal.pone.0070633>
2. Li T, Lin G, Zhang X, Chen Y, Zhang S, Chen B (2014) Relative importance of an arbuscular mycorrhizal fungus (Rhizophagus intraradices) and root hairs in plant drought tolerance. Mycorrhiza 24(8):595-602. <https://doi.org/10.1007/s00572-014-0578-3>

**Acaulospora:**

1. Biermann B, Linderman RG (1983) Use of vesicular-arbuscular mycorrhizal roots, intraradical vesicles and extraradical vesicles as inoculum. New Phytol 95(1):97-105. <https://doi.org/10.1111/j.1469-8137.1983.tb03471.x>
2. Morton JB, Benny GL (1990) Revised classification of arbuscular mycorrhizal fungi (Zygomycetes): A new order, Glomales, two new suborders, Glomineae and Gigasporineae, and two new families, Acaulosporaceae and Gigasporaceae, with an emendation of Glomaceae. Mycotaxon 37:471-491
3. Nopphakat K, Runsaeng P, Klinnawee L (2021) Acaulospora as the dominant arbuscular mycorrhizal fungi in organic lowland rice paddies improves phosphorus availability in soils. Sustainability 14(1):31. <https://doi.org/10.3390/su14010031>

**Gigaspora:**

1. Long LK, Yao Q, Huang YH, Yang RH, Guo J, Zhu HH (2010) Effects of arbuscular mycorrhizal fungi on zinnia and the different colonization between Gigaspora and Glomus. World J Microbiol Biotechnol 26(8):1527-1531. <https://doi.org/10.1007/s11274-010-0336-4>
2. Lumini E, Bianciotto V, Jargeat P et al (2007) Presymbiotic growth and sporal morphology are affected in the arbuscular mycorrhizal fungus Gigaspora margarita cured of its endobacteria. Cell Microbiol 9(7):1716-1729. <https://doi.org/10.1111/j.1462-5822.2007.00907.x>

**Tuber:**

1. Le Tacon F, Zeller B, Plain C et al (2013) Carbon transfer from the host to Tuber melanosporum mycorrhizas and ascocarps followed using a 13C pulse-labeling technique. PLoS One 8(5):e64626. <https://doi.org/10.1371/journal.pone.0064626>
2. Boutahir S, Iotti M, Piattoni F, Zambonelli A (2013) Morphological and molecular characterization of Tuber oligospermum mycorrhizas. Afr J Agric Res 8(29):4081-4087. <https://doi.org/10.5897/AJAR2013.7098>
3. Huang LL, Guerin-Laguette A, Wang R, Yu FQ (2020) Characterization of Tuber indicum (Pezizales, Tuberaceae) mycorrhizae synthesized with four host trees exotic to China. Symbiosis 82(3):215-224. <https://doi.org/10.1007/s13199-020-00723-9>
4. Schneider-Maunoury L, Leclercq S, Clément C et al (2020) Two ectomycorrhizal truffles, Tuber melanosporum and T. aestivum, endophytically colonise roots of non-ectomycorrhizal plants in natural environments. New Phytol 225(6):2542-2556. <https://doi.org/10.1111/nph.16321>

**(III) Nutrient Cycling**

**Aspergillus:**

1. Nayak S, Samanta S, Mukherjee AK (2020) Beneficial role of Aspergillus sp. in agricultural soil and environment. In: Frontiers in soil and environmental microbiology. Apple Academic Press, pp 17-36
2. Klaic R, Guimarães GG, Giroto AS et al (2021) Synergy of Aspergillus niger and components in biofertilizer composites increases the availability of nutrients to plants. Curr Microbiol 78(4):1529-1542. <https://doi.org/10.1007/s00284-021-02397-7>
3. Flipphi M, Sun J, Robellet X et al (2009) Biodiversity and evolution of primary carbon metabolism in Aspergillus nidulans and other Aspergillus spp. Fungal Genet Biol 46(1):S19-S44. <https://doi.org/10.1016/j.fgb.2008.07.018>

**Talaromyces:**

1. Abbas A, Ali S, Mubeen M et al (2025) Talaromyces spp. are promising biocontrol agents for sustainable agriculture. In: Microbial Biocontrol Techniques: Importance in Ensuring Food Security. Springer Nature Singapore, pp 245-280. <https://doi.org/10.1007/978-981-97-5991-0_10>
2. Chandra P, Rai AK, Basak N et al (2025) Mitigating Salinity Stress in Crops using Talaromyces sp.: Impacts on Phosphorus Solubilization, Growth and P Nutrition. J Soil Sci Plant Nutr 1-13. <https://doi.org/10.1007/s42729-024-02126-x>
3. Mishra B, Priyadharshini B, Sabareesh V (2025) Experimental Investigations on Growth Dynamics of Terrestrial Talaromyces Sp. Bsp_vit1: A Prospective Biocontrol and Antifungal Strain. [DOI pending publication]

**Penicillium:**

1. Srinivasan R, Prabhu G, Prasad M et al (2020) Penicillium. In: Beneficial microbes in agro-ecology. Academic Press, pp 651-667. <https://doi.org/10.1016/B978-0-12-823414-3.00032-6>
2. Hao X, Zhu YG, Nybroe O, Nicolaisen MH (2020) The composition and phosphorus cycling potential of bacterial communities associated with hyphae of Penicillium in soil are strongly affected by soil origin. Front Microbiol 10:2951. <https://doi.org/10.3389/fmicb.2019.02951>
3. Babu AG, Kim SW, Yadav DR, Hyum U, Adhikari M, Lee YS (2015) Penicillium menonorum: a novel fungus to promote growth and nutrient management in cucumber plants. Mycobiology 43(1):49-56. <https://doi.org/10.5941/MYCO.2015.43.1.49>

**Mortierella:**

1. Ozimek E, Hanaka A (2020) Mortierella species as the plant growth-promoting fungi present in the agricultural soils. Agriculture 11(1):7. <https://doi.org/10.3390/agriculture11010007>
2. Wang L, Wang J, Tang Z, Wang J, Zhang Y (2024) Long-term organic fertilization reshapes the communities of bacteria and fungi and enhances the activities of C-and P-cycling enzymes in calcareous alluvial soil. Appl Soil Ecol 194:105204. <https://doi.org/10.1016/j.apsoil.2023.105204>

**Chaetomium:**

1. Wan R, Wang H, Liang X et al (2025) Response of Chaetomium sp. to Nitrogen Input and Its Potential Role in Rhizosphere Enrichment of Lycium barbarum. Microorganisms 13(8):1864. <https://doi.org/10.3390/microorganisms13081864>
2. Ma X, Zhang Y, Wei F et al (2023) Applications of Chaetomium globosum CEF-082 improve soil health and mitigate the continuous cropping obstacles for Gossypium hirsutum. Ind Crops Prod 197:116586. <https://doi.org/10.1016/j.indcrop.2023>
